# Supplementary material
Source: PubMed Central journal article supplement (PMC6317530)
Supplement: ja8b09609_si_001.pdf [file ja8b09609_si_001.pdf]

## SUPPORTING INFORMATION

**Enzyme Architecture: Breaking Down the Catalytic Cage that Activates Orotidine 5'-Monophosphate Decarboxylase for Catalysis.**

Archie C. Reyes,<sup>†</sup> David C. Plache,<sup>†</sup> Astrid P. Koudelka,<sup>†</sup> Tina L. Amyes,<sup>†</sup> John A. Gerlt,<sup>‡</sup> and John P. Richard<sup>†,\*</sup>

<sup>†</sup>Department of Chemistry, University at Buffalo, SUNY, Buffalo, New York 14260-3000.

<sup>‡</sup> Department of Chemistry and Biochemistry, University of Illinois, Urbana, Illinois 61801.

\* Author to whom correspondence should be addressed: *Email:* [jrichard@buffalo.edu](mailto:jrichard@buffalo.edu)

---

**RESULTS**

The kinetic parameters from Figure 2A were determined using the Michaelis-Menten equation, with the assumption that  $[OMP] \gg [E \cdot OMP]$ , where  $[OMP]$  and  $[E \cdot OMP]$  are the concentration of free OMP and the Michaelis complex, respectively. Table S1 shows the values of  $[E \cdot OMP]$  calculated for Figure 2A using the kinetic parameters obtained from the fit of the kinetic data to the Michaelis-Menten equation, and the initial enzyme concentration  $[E]_0$  and substrate concentration  $[OMP]_0$ . Table S1 shows for all cases that  $[E \cdot OMP]$  is  $< 10\%$  of  $[OMP]_0$ . The uncertainty in the derived kinetic parameter ( $k_{cat}/K_m$ ) introduced by the accumulation of  $E \cdot OMP$  is along the lines of that introduced into steady-state kinetic treatments by the small decrease in initial velocity observed over the first *ca* 10% reaction of substrate.

**Table S1.** Comparison of initial substrate concentrations  $[S]_0$  with the concentration of substrate present after correction for the formation of Michaelis complex:  $[S] = ([S]_0 - [ES])$ .

| Mutant OMPDC                                                                                                | $[E]_0$<br>mM | $[OMP]_0$<br>mM | $(v/[E]_0)/10^{-4} s^{-1}$ | $(v/v_{max})$ | $[E \cdot OMP]$<br>(mM) <sup>a</sup> | $[S]_0 - [E \cdot OMP]$<br>mM |
|-------------------------------------------------------------------------------------------------------------|---------------|-----------------|----------------------------|---------------|--------------------------------------|-------------------------------|
| S154A/R235A<br><br>$(v_{max}/[E]) = k_{cat}$<br>$= 0.54 \times 10^{-4} s^{-1}$<br><br>$K_m = 0.0020 M$      | 0.20          | 0.50            | 0.109                      | 0.20          | 0.040                                | 0.46                          |
|                                                                                                             | 0.20          | 1.0             | 0.17                       | 0.31          | 0.062                                | 0.94                          |
|                                                                                                             | 0.20          | 2.0             | 0.22                       | 0.41          | 0.081                                | 1.92                          |
|                                                                                                             | 0.20          | 3.0             | 0.29                       | 0.54          | 0.11                                 | 2.89                          |
| S154A/Q215A/Y217F<br><br>$(v_{max}/[E]) = k_{cat}$<br>$= 4.2 \times 10^{-4} s^{-1}$<br><br>$K_m = 0.0015 M$ | 0.10          | 0.50            | 1.07                       | 0.25          | 0.025                                | 0.475                         |
|                                                                                                             | 0.10          | 1.0             | 1.94                       | 0.46          | 0.046                                | 0.95                          |
|                                                                                                             | 0.10          | 2.0             | 2.76                       | 0.66          | 0.066                                | 1.93                          |
|                                                                                                             | 0.10          | 3.0             | 3.39                       | 0.81          | 0.081                                | 2.92                          |

<sup>a</sup>  $[E \cdot OMP] = [(v/v_{max})][E]_0$ , where  $v_{max}$  is the observed activity when  $[E \cdot OMP] = [E]_0$ .

Figure S1 shows the linear plot of  $v/[E]$  against  $[FOMP]$  for *Ec*OMPDC-catalyzed decarboxylation of FOMP, with slope of  $k_{cat}/K_m = 2.7 \times 10^6 \text{ M}^{-1} \text{ s}^{-1}$ . Figures S2A–D shows time-courses for the change in absorbance at 282 nm for decarboxylation of FOMP catalyzed by the S154A/Y217F (Figure S2A), S154A/R235A (Figure S2B), S154A/Q215A/Y217F (Figure S2C) and the S154A/Q215A/R235A (Figure S2D) mutants of *Sc*OMPDC. The solid lines show the fit of the experimental data for each Figure to the exponential decay for the pseudo first-order enzyme-catalyzed reaction of FOMP, to give the observed first order rate constant  $k_{obsd} \text{ (s}^{-1}\text{)}$  for OMPDC-catalyzed decarboxylation. In each case the data are fit by a simple exponential decay, which shows that the reactions are first order in  $[FOMP]$  and that the starting concentration  $[FOMP] = 0.06\text{--}0.15 \text{ mM} \ll K_m$  for the OMPDC-catalyzed decarboxylation reaction. Each of the experiments from Figures S2 were repeated at least two times, and the values of  $k_{obsd}/[E]$  for a given mutant *Sc*OMPDC-catalyzed decarboxylation were reproducible to better than  $\pm 10\%$ .

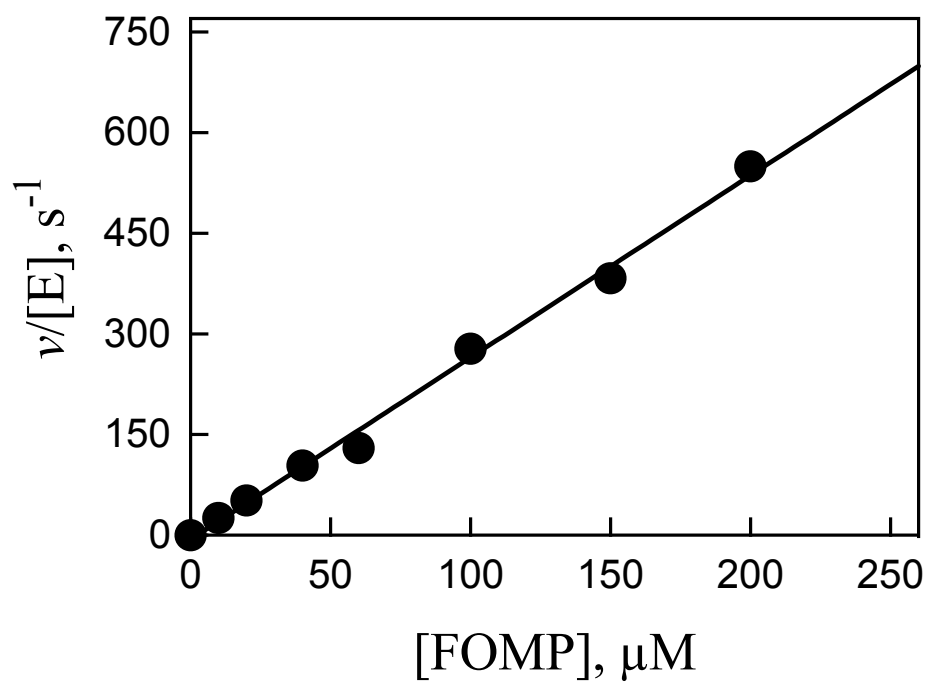

**Figure S1.** Dependence of  $v/[E]$  ( $\text{s}^{-1}$ ) for decarboxylation of FOMP catalyzed by wild-type *EcOMPDC* on the concentration of FOMP for reactions at 25 °C, pH 7.1 (10 mM MOPS) and at  $I = 0.105$  (NaCl).

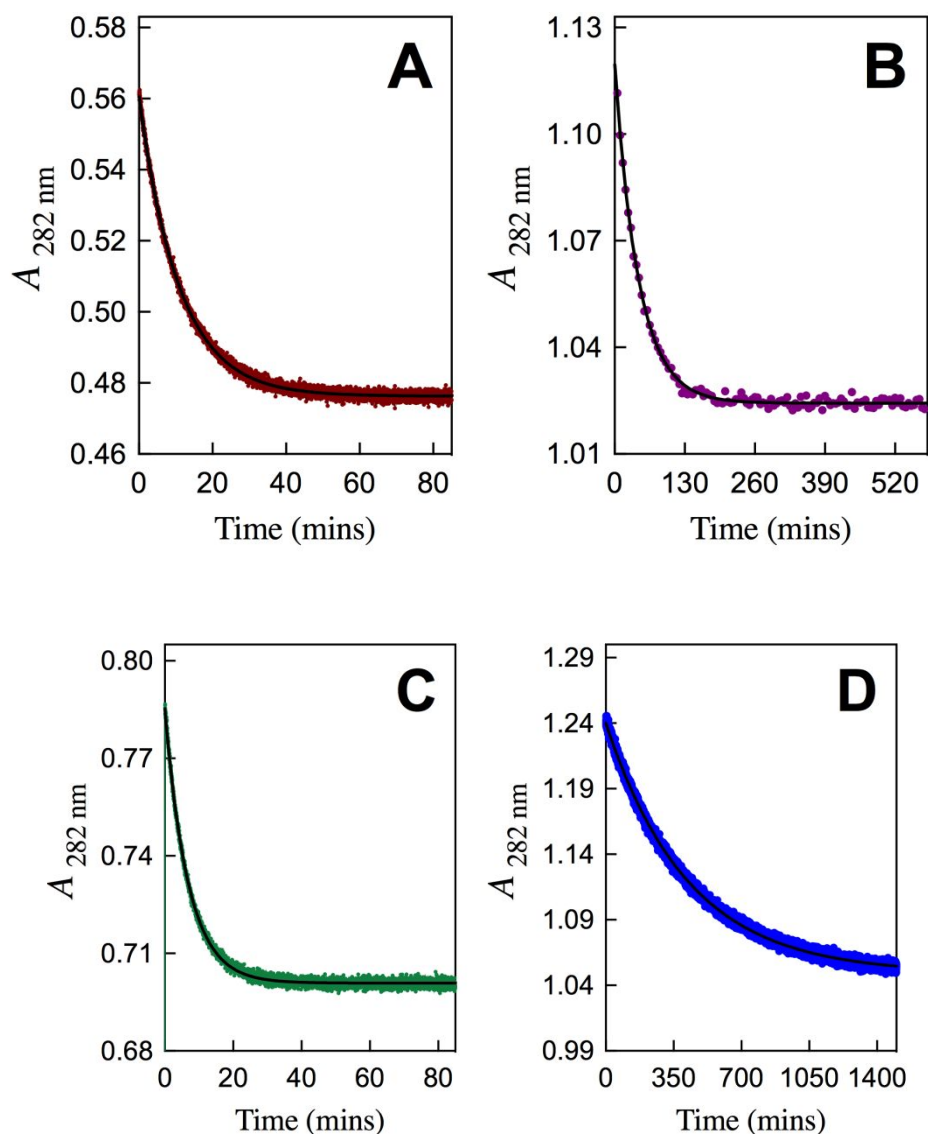

**Figure S2.** Full time-course for the reaction of FOMP catalyzed by mutants of *ScOMPDC* for reactions at 25 °C, pH 7.1 (10 mM MOPS) and at  $I = 0.105$  (NaCl). Figure S1A: decarboxylation of 60  $\mu\text{M}$  FOMP catalyzed by 3.0  $\mu\text{M}$  of the S154A/Y217F mutant of *ScOMPDC*. Figure S1B: decarboxylation of 60  $\mu\text{M}$  FOMP catalyzed by 0.02 mM of the S154A/R235A mutant of *ScOMPDC*. Figure S1C: decarboxylation of 60  $\mu\text{M}$  FOMP catalyzed by 0.01 mM of the S154A/Q215A/Y217F mutant of *ScOMPDC*. Figure S1D: decarboxylation of 150  $\mu\text{M}$  FOMP catalyzed by 6  $\mu\text{M}$  of the S154A/Q215A/R235A mutant of *ScOMPDC*.
